# Supplementary material for: Stratospheric ozone loss in the Arctic winters between 2005 and2013 derived with ACE-FTS measurements
Source: Copernicus journal article supplement (doi:10.5194/acp-2017-1075), 2018-01-02
Supplement: Supplementary file 1 [file acp-2017-1075-supplement.pdf]

# **Stratospheric ozone loss in the Arctic derived with ACE-FTS measurements between 2005 and 2013**

**Debora Griffin et al.**

*Correspondence to:* Kaley A. Walker  
(kaley.walker@utoronto.ca)

**Table 1.** Linear combination needed to obtain the artificial Tracer 1 that is linearly correlated with ozone (in ppbv), estimated for each year.

| Year | $[\text{CH}_4]_{ppb}$ | $[\text{N}_2\text{O}]_{ppb}$ | $[\text{CCl}_2\text{F}_2]_{ppt}$ | $[\text{CCl}_3\text{F}]_{ppt}$ | intercept | $R^2$ |
|------|-----------------------|------------------------------|----------------------------------|--------------------------------|-----------|-------|
| 2005 | $7.23 \times 10^{-3}$ | $-2.28 \times 10^{-2}$       | $-2.14 \times 10^{-3}$           | $-1.16 \times 10^{-2}$         | 0.24      | 0.81  |
| 2007 | $3.31 \times 10^{-3}$ | $5.35 \times 10^{-3}$        | $-1.34 \times 10^{-2}$           | $-8.83 \times 10^{-3}$         | 1.69      | 0.87  |
| 2008 | $3.31 \times 10^{-3}$ | $5.35 \times 10^{-3}$        | $-1.34 \times 10^{-2}$           | $-8.83 \times 10^{-3}$         | 1.69      | 0.87  |
| 2010 | $1.14 \times 10^{-3}$ | $-7.65 \times 10^{-3}$       | $9.38 \times 10^{-4}$            | $-1.14 \times 10^{-2}$         | 2.81      | 0.88  |
| 2011 | $9.34 \times 10^{-4}$ | $-7.45 \times 10^{-4}$       | $-3.41 \times 10^{-3}$           | $-9.46 \times 10^{-3}$         | 2.86      | 0.90  |

**Table 2.** Linear combination needed to obtain the artificial Tracer 4 that is linearly correlated with ozone (in ppbv), estimated for each year.

| Year | $[\text{CH}_4]_{ppb}$ | $[\text{N}_2\text{O}]_{ppb}$ | $[\text{OCS}]_{ppt}$   | $[\text{CCl}_2\text{F}_2]_{ppt}$ | intercept | $R^2$ |
|------|-----------------------|------------------------------|------------------------|----------------------------------|-----------|-------|
| 2005 | $7.80 \times 10^{-3}$ | $-3.77 \times 10^{-2}$       | $4.51 \times 10^{-3}$  | $-1.60 \times 10^{-2}$           | 0.72      | 0.81  |
| 2007 | $2.78 \times 10^{-3}$ | $-1.14 \times 10^{-2}$       | $-1.99 \times 10^{-3}$ | $-1.13 \times 10^{-2}$           | 0.39      | 0.85  |
| 2008 | $2.78 \times 10^{-3}$ | $-1.14 \times 10^{-2}$       | $-1.99 \times 10^{-3}$ | $-1.13 \times 10^{-2}$           | 0.39      | 0.85  |
| 2010 | $1.78 \times 10^{-4}$ | $1.39 \times 10^{-3}$        | $-4.84 \times 10^{-3}$ | $-6.56 \times 10^{-3}$           | 0.20      | 0.89  |
| 2011 | $2.22 \times 10^{-4}$ | $-5.03 \times 10^{-4}$       | $-3.91 \times 10^{-3}$ | $-6.05 \times 10^{-3}$           | 0.23      | 0.90  |

**Table 3.** Average vortex descent (in K/1.5 months) estimated with  $\text{CH}_4$ .

| Year | 380-400 K | 400-420 K | 420-440K | 440-460 K | 460-480 K | 480-500 K | 500-520 K | 520-540 K |
|------|-----------|-----------|----------|-----------|-----------|-----------|-----------|-----------|
| 2005 | 5.46      | 4.91      | 1.53     | 3.17      | -5.67     | -16.66    | -20.75    | -31.84    |
| 2007 | -2.75     | -0.75     | -4.23    | -7.43     | -10.05    | -7.49     | -11.38    | -6.42     |
| 2008 | -1.04     | -3.08     | -9.63    | -10.69    | -22.21    | -27.44    | -29.48    | -31.93    |
| 2010 | 0.98      | 1.34      | -2.36    | -3.48     | -9.01     | -12.23    | -12.55    | -18.94    |
| 2011 | 2.30      | -5.17     | -9.28    | -10.93    | -18.06    | -24.67    | -26.60    | -26.13    |

**Table 4.** Average vortex descent (in K/1.5 months) estimated with  $\text{N}_2\text{O}$ .

| Year | 380-400 K | 400-420 K | 420-440K | 440-460 K | 460-480 K | 480-500 K | 500-520 K | 520-540 K |
|------|-----------|-----------|----------|-----------|-----------|-----------|-----------|-----------|
| 2005 | 5.71      | 4.68      | -0.39    | 3.21      | -4.98     | -13.07    | -12.72    | -22.26    |
| 2007 | -3.81     | -0.57     | -3.89    | -7.95     | -6.76     | -3.44     | 1.33      | 7.87      |
| 2008 | -0.28     | -2.88     | -10.63   | -12.71    | -23.38    | -26.59    | -23.03    | -21.85    |
| 2010 | 1.34      | 1.88      | -2.29    | -4.19     | -8.01     | -7.69     | -4.58     | -7.60     |
| 2011 | 6.10      | -3.98     | -8.43    | -11.73    | -18.81    | -24.34    | -22.91    | -19.90    |

**Table 5.** Average vortex descent (in K/1.5 months) estimated with HF.

| Year | 380-400 K | 400-420 K | 420-440K | 440-460 K | 460-480 K | 480-500 K | 500-520 K | 520-540 K |
|------|-----------|-----------|----------|-----------|-----------|-----------|-----------|-----------|
| 2005 | 5.08      | 2.17      | -2.37    | 1.40      | -7.39     | -16.13    | -21.33    | -30.35    |
| 2007 | -3.04     | -3.34     | -9.70    | -14.10    | -21.23    | -15.94    | -32.31    | -32.97    |
| 2008 | -2.43     | -3.06     | -12.70   | -13.75    | -22.39    | -28.40    | -29.12    | -31.41    |
| 2010 | 1.46      | 2.96      | -0.49    | -2.48     | -11.17    | -13.91    | -19.51    | -21.60    |
| 2011 | -7.42     | -7.17     | -13.45   | -16.11    | -21.27    | -25.42    | -26.14    | -24.85    |

**Table 6.** Average vortex descent (in K/1.5 months) estimated with  $\text{CCl}_2\text{F}_2$ .

| Year | 380-400 K | 400-420 K | 420-440K | 440-460 K | 460-480 K | 480-500 K | 500-520 K | 520-540 K |
|------|-----------|-----------|----------|-----------|-----------|-----------|-----------|-----------|
| 2005 | 2.70      | 3.80      | -0.60    | 4.03      | -3.24     | -10.82    | -12.30    | -22.65    |
| 2007 | -8.39     | -3.24     | -3.41    | -8.12     | -6.78     | -1.32     | 4.12      | 9.90      |
| 2008 | -6.33     | -3.66     | -10.20   | -12.88    | -22.88    | -28.36    | -25.74    | -24.16    |
| 2010 | -0.27     | 1.03      | -1.92    | -4.52     | -8.97     | -10.55    | -7.85     | -10.80    |
| 2011 | -3.81     | -4.45     | -8.72    | -12.69    | -19.52    | -24.85    | -22.26    | -19.74    |

Table 7. Average vortex descent (in K/1.5 months) estimated with OCS.

| Year | 380-400 K | 400-420 K | 420-440K | 440-460 K | 460-480 K | 480-500 K | 500-520 K | 520-540 K |
|------|-----------|-----------|----------|-----------|-----------|-----------|-----------|-----------|
| 2005 | 10.49     | 6.98      | 0.61     | 10.54     | 5.87      | 2.01      | 2.08      | -8.52     |
| 2007 | -8.22     | 5.49      | -6.33    | -3.68     | 22.14     | 34.45     | 38.06     | 30.14     |
| 2008 | 2.27      | 1.25      | -12.91   | -12.85    | -15.13    | -12.37    | -0.66     | 8.56      |
| 2010 | 2.78      | 6.12      | -2.91    | -1.26     | 0.25      | 7.39      | 15.58     | 5.47      |
| 2011 | 6.45      | 3.37      | -9.75    | -14.45    | -15.26    | -13.26    | -5.79     | -7.20     |

Table 8. Average vortex descent (in K/1.5 months) estimated with CCl<sub>3</sub>F.

| Year | 380-400 K | 400-420 K | 420-440K | 440-460 K | 460-480 K | 480-500 K | 500-520 K | 520-540 K |
|------|-----------|-----------|----------|-----------|-----------|-----------|-----------|-----------|
| 2010 | 4.93      | 7.55      | -7.37    | -0.44     | 4.19      | 7.85      | 18.98     | -4.14     |

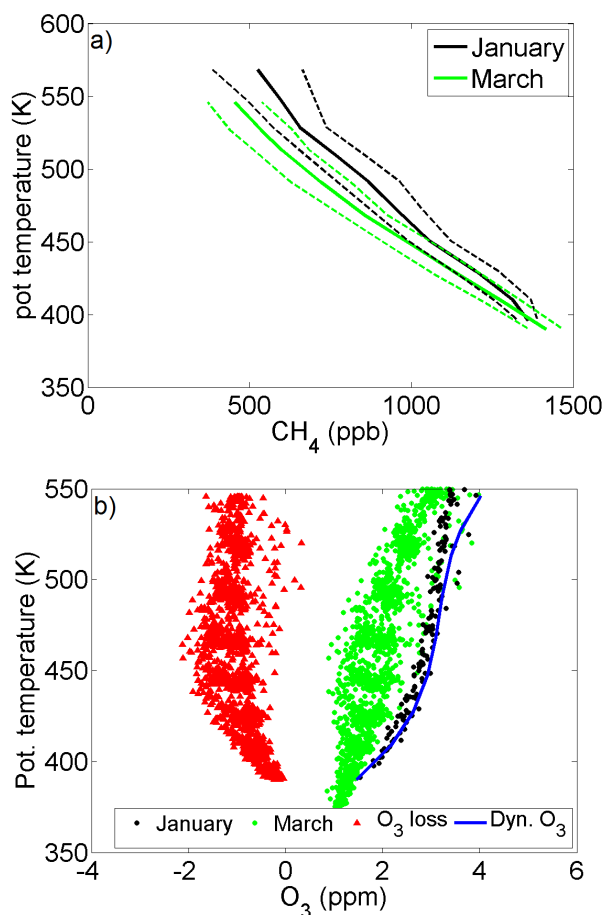

Figure 1. Panel (a) shows the monthly average CH<sub>4</sub> profiles observed by ACE-FTS inside the polar vortex in January (black line) and March (green line) 2011 together with the respective standard deviations (shown as dashed lines). Panel (b) displays the observed ACE-FTS ozone in January (black dots) and March (green dots) 2011, the dynamic ozone (blue line) for March 2011, estimated from the average vortex profile descent from CH<sub>4</sub>, and the ozone loss (red triangles; the difference between observed and average passive ozone in March).

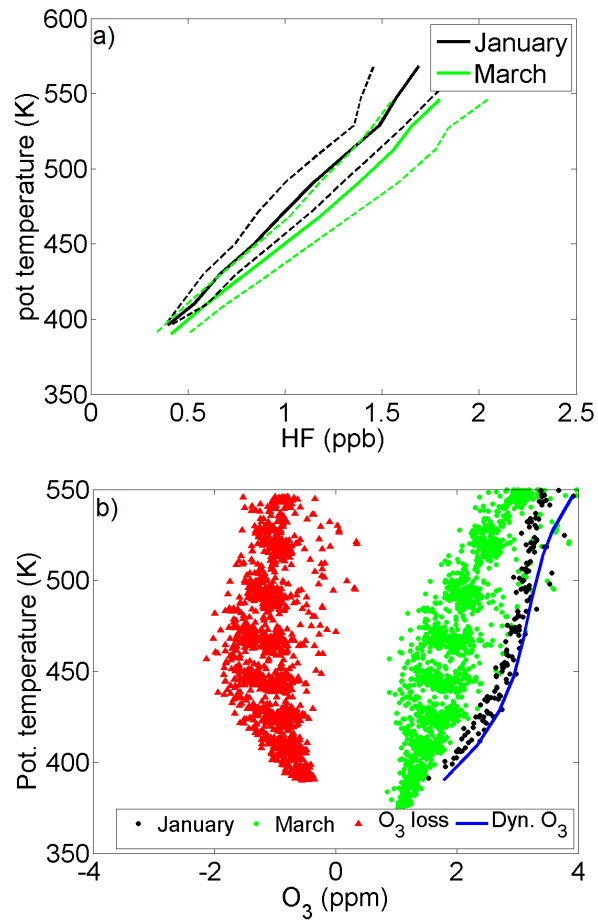

**Figure 2.** Panel (a) shows the monthly average HF profiles observed by ACE-FTS inside the polar vortex in January (black line) and March (green line) 2011 together with the respective standard deviations (shown as dashed lines). Panel (b) displays the observed ACE-FTS ozone in January (black dots) and March (green dots) 2011, the dynamic ozone (blue line) for March 2011, estimated from the average vortex profile descent from HF, and the ozone loss (red triangles; the difference between observed and average passive ozone in March).

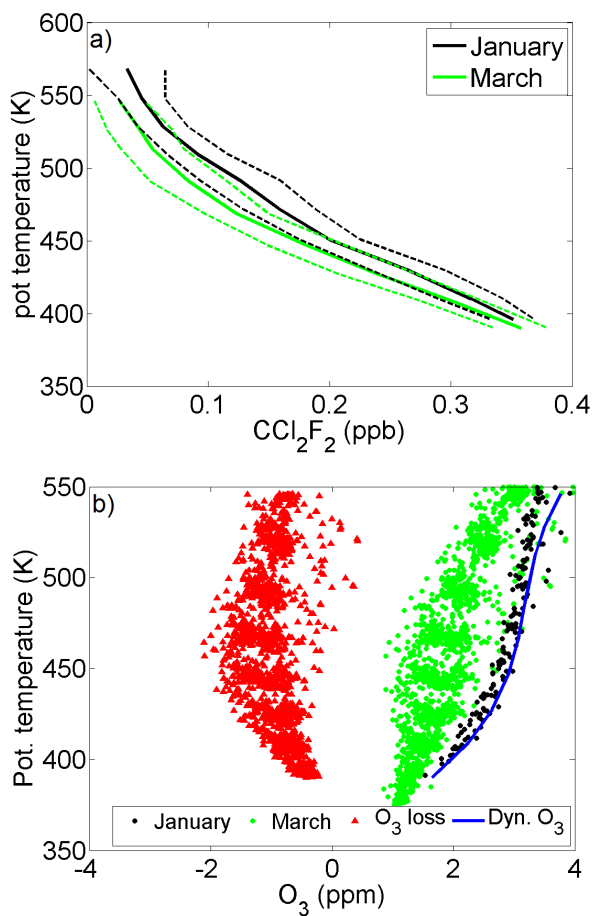

**Figure 3.** Panel (a) shows the monthly average  $\text{CCl}_2\text{F}_2$  profiles observed by ACE-FTS inside the polar vortex in January (black line) and March (green line) 2011 together with the respective standard deviations (shown as dashed lines). Panel (b) displays the observed ACE-FTS ozone in January (black dots) and March (green dots) 2011, the dynamic ozone (blue line) for March 2011, estimated from the average vortex profile descent from  $\text{CCl}_2\text{F}_2$ , and the ozone loss (red triangles; the difference between observed and average passive ozone in March).

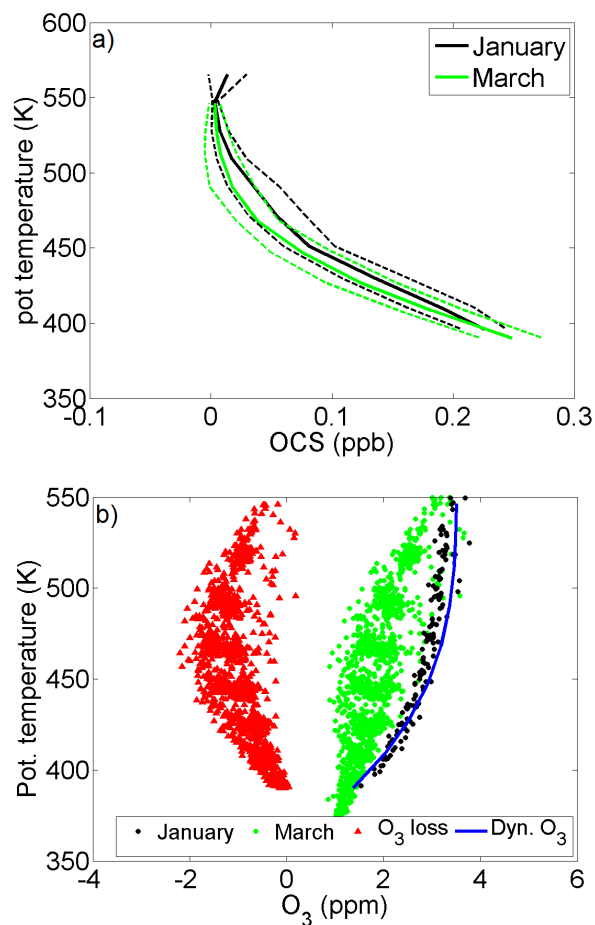

**Figure 4.** Panel (a) shows the monthly average OCS profiles observed by ACE-FTS inside the polar vortex in January (black line) and March (green line) 2011 together with the respective standard deviations (shown as dashed lines). Panel (b) displays the observed ACE-FTS ozone in January (black dots) and March (green dots) 2011, the dynamic ozone (blue line) for March 2011, estimated from the average vortex profile descent from OCS, and the ozone loss (red triangles; the difference between observed and average passive ozone in March).
